# Supplementary material for: Validation of a Brief Dietary Questionnaire for Use in Clinical Practice: Mini‐EAT (Eating Assessment Tool)
Source: PubMed Central journal article supplement — J Am Heart Assoc. 2022 Dec 30;12(1):e025064. doi: 10.1161/JAHA.121.025064 (PMC9973598; doi:10.1161/jaha.121.025064), 2022-12-30

## **SUPPLEMENTAL MATERIAL**

**Table S1. Reliability Analysis Using Intraclass Correlation Coefficient**

| Variable | ICC (95%)            |
|----------|----------------------|
| Q1       | 0.998 (0.997, 0.999) |
| Q2       | 0.998 (0.996, 0.998) |
| Q3       | 0.995 (0.993, 0.997) |
| Q4       | 1                    |
| Q5       | 0.996 (0.994, 0.997) |
| Q6       | 1                    |
| Q7       | 0.988 (0.981, 0.992) |
| Q8       | 1                    |
| Q9       | 0.996 (0.994, 0.997) |
| Q10      | 0.997 (0.995, 0.998) |
| Q11      | 0.998 (0.997, 0.999) |
| Q12      | 0.992 (0.987, 0.995) |
| Q13      | 0.998 (0.997, 0.999) |
| Q14      | 0.988 (0.981, 0.992) |
| Q15      | 0.997 (0.996, 0.998) |
| Q16      | 0.995 (0.993, 0.997) |
| Q17      | 0.982 (0.973, 0.989) |
| Q18      | 0.994 (0.99, 0.996)  |
| Q19      | 1                    |
| HEI      | 0.859 (0.788, 0.908) |

**Table S2. Linear regression model predicting HEI score using all EAT 19 questions**

| term                                                                                 | Beta95CI             | P-value |
|--------------------------------------------------------------------------------------|----------------------|---------|
| Question 1/19 How often do you eat fresh fruits?                                     | 2.08 (1.63, 2.53)    | <0.001  |
| Question 2/19 How often do you eat vegetables?                                       | 0.57 (0.02, 1.12)    | 0.0418  |
| Question 3/19 How often do you eat legumes, nuts and seeds?                          | 0.53 (0.05, 1.02)    | 0.0312  |
| Question 4/19 How often do you eat whole grains?                                     | 1.35 (0.94, 1.75)    | <0.001  |
| Question 5/19 How often do you eat refined grains?                                   | -0.99 (-1.39, -0.58) | <0.001  |
| Question 6/19 How often do you eat fish or seafood?                                  | 0.73 (0.04, 1.43)    | 0.0393  |
| Question 7/19 How often do you eat olive oil, canola oil, sunflower oil, or avocado? | 0.25 (-0.17, 0.68)   | 0.2397  |
| Question 8/19 How often do you eat unprocessed red meat?                             | -0.29 (-0.9, 0.33)   | 0.3617  |
| Question 9/19 How often do you eat poultry?                                          | 0.16 (-0.42, 0.74)   | 0.5880  |
| Question 10/19 How often do you eat processed meat?                                  | -0.49 (-1.21, 0.22)  | 0.1770  |
| Question 11/19 How often do you eat low fat dairy?                                   | 0.89 (0.55, 1.23)    | <0.001  |
| Question 12/19 How often do you eat high fat dairy and saturated fats?               | -0.95 (-1.35, -0.54) | <0.001  |
| Question 13/19 How often do you drink sugar-sweetened beverages or fruit juices?     | -0.25 (-0.65, 0.15)  | 0.2177  |
| Question 14/19 How often do you eat sweets and sweet foods?                          | -0.66 (-1.18, -0.14) | 0.0128  |
| Question 15/19 How often do you eat cocoa products?                                  | 0.07 (-0.44, 0.58)   | 0.7793  |
| Question 16/19 How often do you eat salty snacks?                                    | 0.05 (-0.43, 0.53)   | 0.8448  |
| Question 17/19 How many processed meals do you eat in a typical week?                | -0.49 (-1.09, 0.1)   | 0.1054  |
| Question 18/19 How often do you eat fast food restaurant meals?                      | -0.42 (-1.34, 0.5)   | 0.3673  |
| Question 19/19 How many drinks of alcohol do you have in a typical week?             | 0.48 (-0.08, 1.05)   | 0.0948  |

**Table S3. Linear regression model predicting HEI score using only statistically significant questions from EAT**

| Question                                                               | Beta95CI             | P-value |
|------------------------------------------------------------------------|----------------------|---------|
| Question 1/19 How often do you eat fresh fruits?                       | 2.12 (1.67, 2.56)    | <0.001  |
| Question 2/19 How often do you eat vegetables?                         | 0.85 (0.33, 1.37)    | 0.0015  |
| Question 3/19 How often do you eat legumes, nuts and seeds?            | 0.72 (0.25, 1.18)    | 0.0027  |
| Question 4/19 How often do you eat whole grains?                       | 1.44 (1.05, 1.84)    | <0.001  |
| Question 5/19 How often do you eat refined grains?                     | -1.14 (-1.52, -0.76) | <0.001  |
| Question 6/19 How often do you eat fish or seafood?                    | 0.9 (0.22, 1.57)     | 0.0094  |
| Question 11/19 How often do you eat low fat dairy?                     | 0.81 (0.48, 1.15)    | <0.001  |
| Question 12/19 How often do you eat high fat dairy and saturated fats? | -1.03 (-1.42, -0.63) | <0.001  |
| Question 14/19 How often do you eat sweets and sweet foods?            | -0.89 (-1.33, -0.46) | <0.001  |

**Table S4. Distribution of Mini-EAT™ score by HEI score**

|                | <51 (N=93)              | 51-80 (N=516)           | >80 (N=52)              | Total (N=661)           | p value |
|----------------|-------------------------|-------------------------|-------------------------|-------------------------|---------|
| Mini-EAT score |                         |                         |                         |                         | < 0.001 |
| Mean (SD)      | 55.658 (6.498)          | 64.925 (7.284)          | 74.836 (5.946)          | 64.401 (8.342)          |         |
| Median (Range) | 54.760 (42.273, 85.134) | 65.159 (36.822, 88.877) | 75.675 (60.238, 86.191) | 64.607 (36.822, 88.877) |         |
| Q1, Q3         | 52.014, 59.426          | 60.339, 70.012          | 70.526, 79.133          | 58.871, 70.198          |         |

**Table S5. 5-Fold Cross Validation for Model**

| Resample | n   | Mean residual | Median residual | cor  | accuracy |
|----------|-----|---------------|-----------------|------|----------|
| Fold1    | 132 | 1.18          | 2.35            | 0.73 | 0.77     |
| Fold2    | 132 | -0.86         | -0.72           | 0.72 | 0.73     |
| Fold3    | 133 | 0.37          | 1.18            | 0.73 | 0.80     |
| Fold4    | 132 | 0.17          | 1.00            | 0.65 | 0.86     |
| Fold5    | 132 | -0.80         | -0.34           | 0.70 | 0.74     |

Accuracy is defined as the proportion of patients falling into the same category using both HEI and Mini-EAT when scores are divided into <51, 51-80, >80

**Table S6. EAT answers by HEI total score**

| Question                                                      | HEI<51<br>(N=93) | HEI=51-80<br>(N=516) | HEI>80<br>(N=52) | Total<br>(N=661) | p value |
|---------------------------------------------------------------|------------------|----------------------|------------------|------------------|---------|
| Question 1/19 How often do you eat fresh fruits? <sup>1</sup> |                  |                      |                  |                  | < 0.001 |
| - Less than 1 serving per week                                | 17 (39.5%)       | 26 (60.5%)           | 0 (0.0%)         | 43 (6.5%)        |         |
| - 1-2 servings per week                                       | 33 (31.7%)       | 71 (68.3%)           | 0 (0.0%)         | 104 (15.7%)      |         |
| - 3-4 servings per week                                       | 23 (21.1%)       | 83 (76.1%)           | 3 (2.8%)         | 109 (16.5%)      |         |
| - 5-6 servings per week                                       | 10 (14.9%)       | 53 (79.1%)           | 4 (6.0%)         | 67 (10.1%)       |         |
| - 1 serving per day                                           | 5 (5.0%)         | 90 (90.0%)           | 5 (5.0%)         | 100 (15.1%)      |         |
| - 2-3 servings per day                                        | 3 (1.5%)         | 172 (86.0%)          | 25 (12.5%)       | 200 (30.3%)      |         |
| - 4 or more servings per day                                  | 2 (5.3%)         | 21 (55.3%)           | 15 (39.5%)       | 38 (5.7%)        |         |
| Question 2/19 How often do you eat vegetables?                |                  |                      |                  |                  | < 0.001 |
| - Less than 2 serving per week                                | 37 (43.0%)       | 49 (57.0%)           | 0 (0.0%)         | 86 (13.0%)       |         |
| - 3-4 servings per week                                       | 17 (18.1%)       | 76 (80.9%)           | 1 (1.1%)         | 94 (14.2%)       |         |
| - 5-6 servings per week                                       | 17 (20.5%)       | 64 (77.1%)           | 2 (2.4%)         | 83 (12.6%)       |         |
| - 1 serving per day                                           | 10 (9.9%)        | 84 (83.2%)           | 7 (6.9%)         | 101 (15.3%)      |         |
| - 2-3 servings per day                                        | 8 (3.4%)         | 200 (85.1%)          | 27 (11.5%)       | 235 (35.6%)      |         |
| - 4 or more servings per day                                  | 4 (6.5%)         | 43 (69.4%)           | 15 (24.2%)       | 62 (9.4%)        |         |
| Question 3/19 How often do you eat legumes, nuts and seeds?   |                  |                      |                  |                  | < 0.001 |
| - Less than 1 serving per week                                | 38 (27.5%)       | 97 (70.3%)           | 3 (2.2%)         | 138 (20.9%)      |         |
| - 1-2 servings per week                                       | 29 (18.1%)       | 124 (77.5%)          | 7 (4.4%)         | 160 (24.2%)      |         |
| - 3-4 servings per week                                       | 14 (11.5%)       | 102 (83.6%)          | 6 (4.9%)         | 122 (18.5%)      |         |
| - 5-6 servings per week                                       | 4 (6.9%)         | 48 (82.8%)           | 6 (10.3%)        | 58 (8.8%)        |         |
| - 1 serving per day                                           | 4 (3.3%)         | 99 (82.5%)           | 17 (14.2%)       | 120 (18.2%)      |         |
| - 2 or more servings per day                                  | 4 (6.3%)         | 46 (73.0%)           | 13 (20.6%)       | 63 (9.5%)        |         |
| Question 4/19 How often do you eat whole grains?              |                  |                      |                  |                  | < 0.001 |
| - I do not eat it at all                                      | 13 (38.2%)       | 21 (61.8%)           | 0 (0.0%)         | 34 (5.1%)        |         |
| - Less than 1 serving per week                                | 22 (30.6%)       | 48 (66.7%)           | 2 (2.8%)         | 72 (10.9%)       |         |
| - 1-2 servings per week                                       | 17 (14.0%)       | 102 (84.3%)          | 2 (1.7%)         | 121 (18.3%)      |         |
| - 3-4 servings per week                                       | 18 (13.5%)       | 110 (82.7%)          | 5 (3.8%)         | 133 (20.1%)      |         |
| - 5-6 servings per week                                       | 8 (13.1%)        | 50 (82.0%)           | 3 (4.9%)         | 61 (9.2%)        |         |
| - 1 serving per day                                           | 10 (8.9%)        | 87 (77.7%)           | 15 (13.4%)       | 112 (16.9%)      |         |
| - 2 or more servings per day                                  | 5 (3.9%)         | 98 (76.6%)           | 25 (19.5%)       | 128 (19.4%)      |         |
| Question 5/19 How often do you eat refined grains?            |                  |                      |                  |                  | < 0.001 |
| - I do not eat it at all                                      | 4 (12.1%)        | 27 (81.8%)           | 2 (6.1%)         | 33 (5.0%)        |         |
| - Less than 1 serving per week                                | 9 (9.8%)         | 72 (78.3%)           | 11 (12.0%)       | 92 (13.9%)       |         |
| - 1-2 servings per week                                       | 12 (8.0%)        | 121 (80.7%)          | 17 (11.3%)       | 150 (22.7%)      |         |

|                                                                                     |            |             |            |             |         |
|-------------------------------------------------------------------------------------|------------|-------------|------------|-------------|---------|
| - 3-4 servings per week                                                             | 19 (14.3%) | 104 (78.2%) | 10 (7.5%)  | 133 (20.1%) |         |
| - 5-6 servings per week                                                             | 19 (33.9%) | 35 (62.5%)  | 2 (3.6%)   | 56 (8.5%)   |         |
| - 1 serving per day                                                                 | 9 (10.3%)  | 73 (83.9%)  | 5 (5.7%)   | 87 (13.2%)  |         |
| - 2 or more servings per day                                                        | 21 (19.1%) | 84 (76.4%)  | 5 (4.5%)   | 110 (16.6%) |         |
| Question 6/19 How often do you eat fish or seafood?                                 |            |             |            |             | < 0.001 |
| - I do not eat it at all                                                            | 23 (25.6%) | 57 (63.3%)  | 10 (11.1%) | 90 (13.6%)  |         |
| - Less than 1 serving per week                                                      | 33 (14.4%) | 182 (79.5%) | 14 (6.1%)  | 229 (34.6%) |         |
| - 1 serving per week                                                                | 31 (14.7%) | 165 (78.2%) | 15 (7.1%)  | 211 (31.9%) |         |
| - 2 or more servings per week                                                       | 6 (4.6%)   | 112 (85.5%) | 13 (9.9%)  | 131 (19.8%) |         |
| Question 7/19 How often do you eat olive oil, canola oil, sunflower oil or avocado? |            |             |            |             | < 0.001 |
| - I do not eat it at all                                                            | 6 (18.8%)  | 26 (81.2%)  | 0 (0.0%)   | 32 (4.8%)   |         |
| - Less than 1 serving per week                                                      | 24 (24.5%) | 68 (69.4%)  | 6 (6.1%)   | 98 (14.8%)  |         |
| - 1-2 servings per week                                                             | 17 (12.1%) | 117 (83.0%) | 7 (5.0%)   | 141 (21.3%) |         |
| - 3-4 servings per week                                                             | 20 (14.3%) | 110 (78.6%) | 10 (7.1%)  | 140 (21.2%) |         |
| - 5-6 servings per week                                                             | 12 (16.4%) | 59 (80.8%)  | 2 (2.7%)   | 73 (11.0%)  |         |
| - 1 serving per day                                                                 | 7 (7.0%)   | 82 (82.0%)  | 11 (11.0%) | 100 (15.1%) |         |
| - 2 or more servings per day                                                        | 7 (9.1%)   | 54 (70.1%)  | 16 (20.8%) | 77 (11.6%)  |         |
| Question 8/19 How often do you eat unprocessed red meat?                            |            |             |            |             | 0.063   |
| - N-Miss                                                                            | 0          | 1           | 0          | 1           |         |
| - I do not eat it at all                                                            | 12 (17.9%) | 45 (67.2%)  | 10 (14.9%) | 67 (10.2%)  |         |
| - Less than 1 serving per week                                                      | 18 (15.0%) | 90 (75.0%)  | 12 (10.0%) | 120 (18.2%) |         |
| - 1-2 servings per week                                                             | 23 (9.8%)  | 195 (83.0%) | 17 (7.2%)  | 235 (35.6%) |         |
| - 3-4 servings per week                                                             | 25 (15.4%) | 127 (78.4%) | 10 (6.2%)  | 162 (24.5%) |         |
| - 5 or more servings per week                                                       | 15 (19.7%) | 58 (76.3%)  | 3 (3.9%)   | 76 (11.5%)  |         |
| Question 9/19 How often do you eat poultry?                                         |            |             |            |             | 0.689   |
| - Less than 1 serving per week                                                      | 13 (19.4%) | 46 (68.7%)  | 8 (11.9%)  | 67 (10.1%)  |         |
| - 1-2 servings per week                                                             | 31 (15.3%) | 159 (78.7%) | 12 (5.9%)  | 202 (30.6%) |         |
| - 3-4 servings per week                                                             | 31 (13.0%) | 191 (80.3%) | 16 (6.7%)  | 238 (36.0%) |         |
| - 5-6 servings per week                                                             | 10 (11.4%) | 69 (78.4%)  | 9 (10.2%)  | 88 (13.3%)  |         |
| - 1 serving per day                                                                 | 6 (12.2%)  | 38 (77.6%)  | 5 (10.2%)  | 49 (7.4%)   |         |
| - 2 or more servings per day                                                        | 2 (11.8%)  | 13 (76.5%)  | 2 (11.8%)  | 17 (2.6%)   |         |
| Question 10/19 How often do you eat processed meat?                                 |            |             |            |             | < 0.001 |
| - N-Miss                                                                            | 0          | 1           | 0          | 1           |         |
| - I do not eat it at all                                                            | 11 (15.7%) | 45 (64.3%)  | 14 (20.0%) | 70 (10.6%)  |         |
| - Less than 1 serving per week                                                      | 11 (6.0%)  | 153 (83.2%) | 20 (10.9%) | 184 (27.9%) |         |
| - 1-2 servings per week                                                             | 29 (11.7%) | 203 (82.2%) | 15 (6.1%)  | 247 (37.4%) |         |
| - 3-4 servings per week                                                             | 29 (25.4%) | 82 (71.9%)  | 3 (2.6%)   | 114 (17.3%) |         |
| - 5 or more servings per week                                                       | 13 (28.9%) | 32 (71.1%)  | 0 (0.0%)   | 45 (6.8%)   |         |



|                                                                                 |            |             |            |             |         |
|---------------------------------------------------------------------------------|------------|-------------|------------|-------------|---------|
| Question 11/19 How often do you eat low fat dairy?                              |            |             |            |             | 0.008   |
| - I do not eat it at all                                                        | 16 (19.0%) | 64 (76.2%)  | 4 (4.8%)   | 84 (12.7%)  |         |
| - Less than 1 serving per week                                                  | 15 (19.2%) | 58 (74.4%)  | 5 (6.4%)   | 78 (11.8%)  |         |
| - 1-2 servings per week                                                         | 20 (16.8%) | 96 (80.7%)  | 3 (2.5%)   | 119 (18.0%) |         |
| - 3-4 servings per week                                                         | 18 (15.0%) | 95 (79.2%)  | 7 (5.8%)   | 120 (18.2%) |         |
| - 5-6 servings per week                                                         | 8 (12.1%)  | 53 (80.3%)  | 5 (7.6%)   | 66 (10.0%)  |         |
| - 1 serving per day                                                             | 9 (10.8%)  | 61 (73.5%)  | 13 (15.7%) | 83 (12.6%)  |         |
| - 2 servings per day                                                            | 7 (6.3%)   | 89 (80.2%)  | 15 (13.5%) | 111 (16.8%) |         |
| Question 12/19 How often do you eat high fat dairy and saturated fats?          |            |             |            |             | < 0.001 |
| - I do not eat it at all                                                        | 3 (7.0%)   | 31 (72.1%)  | 9 (20.9%)  | 43 (6.5%)   |         |
| - Less than 1 serving per week                                                  | 10 (9.7%)  | 75 (72.8%)  | 18 (17.5%) | 103 (15.6%) |         |
| - 1-2 servings per week                                                         | 19 (11.7%) | 133 (81.6%) | 11 (6.7%)  | 163 (24.7%) |         |
| - 3-4 servings per week                                                         | 28 (18.8%) | 114 (76.5%) | 7 (4.7%)   | 149 (22.5%) |         |
| - 5-6 servings per week                                                         | 15 (21.7%) | 54 (78.3%)  | 0 (0.0%)   | 69 (10.4%)  |         |
| - 1 serving per day                                                             | 9 (11.8%)  | 61 (80.3%)  | 6 (7.9%)   | 76 (11.5%)  |         |
| - 2 or more servings per day                                                    | 9 (15.5%)  | 48 (82.8%)  | 1 (1.7%)   | 58 (8.8%)   |         |
| Question 13/19 How often do you drink sugar-sweetened beverages or fruit juice? |            |             |            |             | < 0.001 |
| - I do not drink it at all                                                      | 16 (8.4%)  | 146 (76.4%) | 29 (15.2%) | 191 (28.9%) |         |
| - Less than 1 serving per week                                                  | 18 (10.1%) | 148 (82.7%) | 13 (7.3%)  | 179 (27.1%) |         |
| - 1-2 servings per week                                                         | 16 (16.2%) | 75 (75.8%)  | 8 (8.1%)   | 99 (15.0%)  |         |
| - 3-4 servings per week                                                         | 11 (15.9%) | 56 (81.2%)  | 2 (2.9%)   | 69 (10.4%)  |         |
| - 5-6 servings per week                                                         | 8 (25.8%)  | 23 (74.2%)  | 0 (0.0%)   | 31 (4.7%)   |         |
| - 1 serving per day                                                             | 10 (17.5%) | 47 (82.5%)  | 0 (0.0%)   | 57 (8.6%)   |         |
| - 2 or more servings per day                                                    | 14 (40.0%) | 21 (60.0%)  | 0 (0.0%)   | 35 (5.3%)   |         |
| Question 14/19 How often do you eat sweets and sweet foods?                     |            |             |            |             | 0.016   |
| - Less than 1 serving per week                                                  | 13 (10.4%) | 98 (78.4%)  | 14 (11.2%) | 125 (18.9%) |         |
| - 1-2 servings per week                                                         | 17 (9.0%)  | 150 (79.8%) | 21 (11.2%) | 188 (28.4%) |         |
| - 3-4 servings per week                                                         | 19 (14.2%) | 106 (79.1%) | 9 (6.7%)   | 134 (20.3%) |         |
| - 5-6 servings per week                                                         | 11 (21.6%) | 39 (76.5%)  | 1 (2.0%)   | 51 (7.7%)   |         |
| - 1 serving per day                                                             | 19 (18.3%) | 81 (77.9%)  | 4 (3.8%)   | 104 (15.7%) |         |
| - 2 or more servings per day                                                    | 14 (23.7%) | 42 (71.2%)  | 3 (5.1%)   | 59 (8.9%)   |         |
| Question 15/19 How often do you eat cocoa products?                             |            |             |            |             | 0.204   |
| - I do not eat it at all                                                        | 12 (16.4%) | 57 (78.1%)  | 4 (5.5%)   | 73 (11.0%)  |         |
| - Less than 1 serving per week                                                  | 28 (13.9%) | 155 (77.1%) | 18 (9.0%)  | 201 (30.4%) |         |
| - 1-2 servings per week                                                         | 18 (9.8%)  | 151 (82.1%) | 15 (8.2%)  | 184 (27.8%) |         |
| - 3-4 servings per week                                                         | 17 (16.2%) | 82 (78.1%)  | 6 (5.7%)   | 105 (15.9%) |         |
| - 5-6 servings per week                                                         | 9 (32.1%)  | 16 (57.1%)  | 3 (10.7%)  | 28 (4.2%)   |         |

|                                                                                                         |            |             |            |             |         |
|---------------------------------------------------------------------------------------------------------|------------|-------------|------------|-------------|---------|
| - 1 or more serving per day                                                                             | 9 (12.9%)  | 55 (78.6%)  | 6 (8.6%)   | 70 (10.6%)  |         |
| Question 16/19 How often do you eat salty snacks?                                                       |            |             |            |             | < 0.001 |
| - I do not eat it at all                                                                                | 6 (18.8%)  | 21 (65.6%)  | 5 (15.6%)  | 32 (4.8%)   |         |
| - Less than 1 serving per week                                                                          | 13 (9.0%)  | 121 (84.0%) | 10 (6.9%)  | 144 (21.8%) |         |
| - 1-2 servings per week                                                                                 | 24 (14.5%) | 123 (74.1%) | 19 (11.4%) | 166 (25.1%) |         |
| - 3-4 servings per week                                                                                 | 17 (11.3%) | 126 (83.4%) | 8 (5.3%)   | 151 (22.8%) |         |
| - 5-6 servings per week                                                                                 | 17 (24.6%) | 45 (65.2%)  | 7 (10.1%)  | 69 (10.4%)  |         |
| - 1 serving per day                                                                                     | 4 (6.3%)   | 56 (88.9%)  | 3 (4.8%)   | 63 (9.5%)   |         |
| - 2 or more servings per day                                                                            | 12 (33.3%) | 24 (66.7%)  | 0 (0.0%)   | 36 (5.4%)   |         |
| Question 17/19 How many processed meals do you eat in a typical week?                                   |            |             |            |             | < 0.001 |
| - I do not eat it at all                                                                                | 12 (10.3%) | 86 (73.5%)  | 19 (16.2%) | 117 (17.7%) |         |
| - Less than 1 serving per week                                                                          | 17 (8.4%)  | 172 (84.7%) | 14 (6.9%)  | 203 (30.7%) |         |
| - 1-2 servings per week                                                                                 | 27 (15.1%) | 140 (78.2%) | 12 (6.7%)  | 179 (27.1%) |         |
| - 3-4 servings per week                                                                                 | 12 (12.8%) | 76 (80.9%)  | 6 (6.4%)   | 94 (14.2%)  |         |
| - 5-6 servings per week                                                                                 | 10 (31.2%) | 21 (65.6%)  | 1 (3.1%)   | 32 (4.8%)   |         |
| - 1 or more serving per day                                                                             | 15 (41.7%) | 21 (58.3%)  | 0 (0.0%)   | 36 (5.4%)   |         |
| Question 18/19 How often do you eat fast-food restaurant meals?                                         |            |             |            |             | < 0.001 |
| - I do not eat it at all                                                                                | 5 (5.9%)   | 61 (71.8%)  | 19 (22.4%) | 85 (12.9%)  |         |
| - Less than 1 meal per week                                                                             | 31 (10.4%) | 245 (81.9%) | 23 (7.7%)  | 299 (45.2%) |         |
| - 1-2 meals per week                                                                                    | 40 (18.9%) | 163 (76.9%) | 9 (4.2%)   | 212 (32.1%) |         |
| - 3 or more meals per week                                                                              | 17 (26.2%) | 47 (72.3%)  | 1 (1.5%)   | 65 (9.8%)   |         |
| Question 19/19 How many drinks of alcohol do you have in a typical week?                                |            |             |            |             | 0.215   |
| - I do not drink alcohol at all                                                                         | 20 (14.6%) | 108 (78.8%) | 9 (6.6%)   | 137 (20.7%) |         |
| - Less than 1 drink per week                                                                            | 36 (18.4%) | 149 (76.0%) | 11 (5.6%)  | 196 (29.7%) |         |
| - 1-3 drinks per week                                                                                   | 22 (12.0%) | 145 (78.8%) | 17 (9.2%)  | 184 (27.8%) |         |
| - 4-6 drinks per week                                                                                   | 9 (8.7%)   | 82 (78.8%)  | 13 (12.5%) | 104 (15.7%) |         |
| - 7 or more drinks per week                                                                             | 6 (15.0%)  | 32 (80.0%)  | 2 (5.0%)   | 40 (6.1%)   |         |
| 1Categorical variables reported were count (row percent) for subgroups, and count (percent) for overall |            |             |            |             |         |

Figure S1. Scatter plot of HEI score from the first and second response

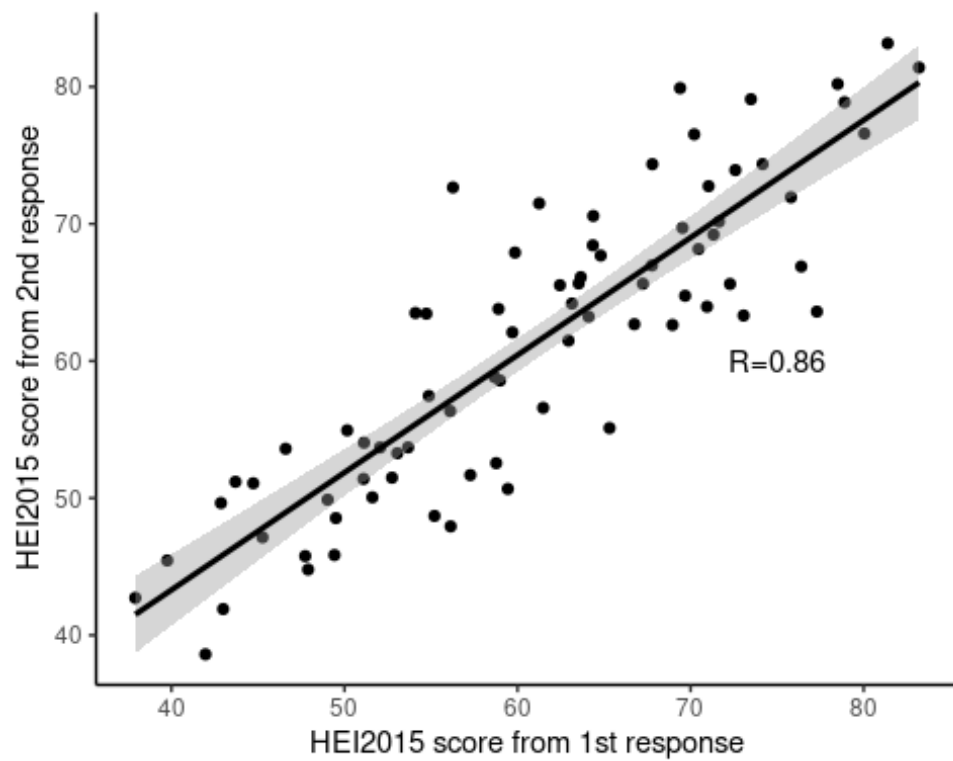

Supplement: JAH3-12-e025064-s001.pdf [file JAH3-12-e025064-s001.pdf]
